# Supplementary material for: Stock of Carbon and Soil Organic Fractions in No-Tillage and Crop–Livestock Integration Systems
Source: MDPI journal article supplement (doi:10.3390/su16073025), 2024-04-05
Supplement: s1 [file s1]

**Supplementary data. Table S1:** Mean values of total organic carbon ( $C_{org}$ ), carbon of Light fraction (C-LF), carbon associated with minerals (C-MIN), Carbon efficiency indices (CEI), LI: lability index (LI) and carbon management index (CMI) with years of establishments and different production systems and soil depths.

| Soil Use/Management System | $C_{org}$<br>----- g kg <sup>-1</sup> ----- | C-LF  | C-MIN | CEI  | LI   | CMI<br>% |
|----------------------------|---------------------------------------------|-------|-------|------|------|----------|
| 0.00 - 0.10 m              |                                             |       |       |      |      |          |
| No- Tillage 11 yrs         | 19.68                                       | 10.70 | 8.98  | 0.68 | 2.04 | 140      |
| Crop-Livestock 5 yrs       | 19.52                                       | 9.00  | 11.53 | 0.67 | 1.35 | 93       |
| Crop-Livestock 10 yrs      | 18.71                                       | 6.27  | 12.44 | 0.65 | 0.88 | 57       |
| Native vegetation          | 28.73                                       | 10.21 | 18.52 | 1.00 | 1.00 | 100      |
| 0.10 - 0.20 m              |                                             |       |       |      |      |          |
| No- Tillage 11 yrs         | 17.55                                       | 8.08  | 9.45  | 0.89 | 5.84 | 523      |
| Crop-Livestock 5 yrs       | 17.57                                       | 8.40  | 9.16  | 0.89 | 6.36 | 568      |
| Crop-Livestock 10 yrs      | 17.03                                       | 6.96  | 10.08 | 0.86 | 4.71 | 413      |
| Native vegetation          | 19.67                                       | 2.53  | 17.14 | 1.00 | 1.00 | 100      |
| 0.20 - 0.40 m              |                                             |       |       |      |      |          |
| No- Tillage 11 yrs         | 15.49                                       | 4.82  | 10.67 | 0.96 | 1.10 | 106      |
| Crop-Livestock 5 yrs       | 14.57                                       | 5.40  | 9.17  | 0.90 | 1.58 | 140      |
| Crop-Livestock 10 yrs      | 15.17                                       | 5.92  | 9.25  | 0.94 | 1.62 | 150      |
| Native vegetation          | 16.07                                       | 4.59  | 11.50 | 1.00 | 1.00 | 100      |
| 0.40 - 0.60 m              |                                             |       |       |      |      |          |
| No- Tillage 11 yrs         | 13.49                                       | 4.58  | 8.91  | 1.13 | 1.85 | 217      |
| Crop-Livestock 5 yrs       | 12.26                                       | 4.32  | 7.94  | 1.03 | 1.96 | 200      |
| Crop-Livestock 10 yrs      | 11.58                                       | 6.56  | 4.87  | 0.97 | 4.86 | 469      |
| Native vegetation          | 11.88                                       | 2.55  | 9.33  | 1.00 | 1.00 | 100      |
